# Supplementary material for: Exploration of Potent Antiviral Phytomedicines from Lauraceae Family Plants against SARS-CoV-2 Main Protease
Source: MDPI journal article supplement (doi:10.3390/v14122783), 2022-12-14
Supplement: s1 [file s1]

# Exploration of Potent Antiviral Phytomedicines from Lauraceae Family Plants against SARS-CoV-2 Main Protease

## S1. Results and Discussion

### S1.1. Structure based virtual screening

**Table S1.** List of screened compounds using MTiopen screen against the SARS-CoV-2 M<sup>pro</sup>.

| S.no. | Compound  | Model ID | Energy | nRot |
|-------|-----------|----------|--------|------|
| 1     | 12302502  | 1        | -9.3   | 0    |
| 2     | 129371873 | 1        | -8.8   | 0    |
| 3     | 13891936  | 1        | -8.6   | 2    |
| 4     | 442194    | 1        | -8.6   | 2    |
| 5     | 160502    | 1        | -8.5   | 2    |
| 6     | 15690954  | 1        | -8.2   | 2    |
| 7     | 101300    | 1        | -8.2   | 2    |
| 8     | 489948    | 1        | -8.1   | 4    |
| 9     | 177744    | 1        | -8.1   | 2    |
| 10    | 10144     | 1        | -8     | 0    |
| 11    | 44578390  | 1        | -7.9   | 0    |
| 12    | 12305138  | 1        | -7.9   | 2    |
| 13    | 168363    | 1        | -7.9   | 2    |
| 14    | 14262868  | 1        | -7.8   | 4    |
| 15    | 14539910  | 1        | -7.8   | 4    |
| 16    | 14539911  | 1        | -7.8   | 4    |
| 17    | 197018    | 1        | -7.7   | 1    |
| 18    | 21222     | 1        | -7.7   | 4    |
| 19    | 24982202  | 1        | -7.7   | 16   |
| 20    | 181681    | 1        | -7.7   | 7    |
| 21    | 16754     | 1        | -7.6   | 0    |
| 22    | 160500    | 1        | -7.6   | 4    |
| 23    | 73337     | 1        | -7.6   | 4    |
| 24    | 439653    | 1        | -7.6   | 0    |
| 25    | 10154     | 1        | -7.6   | 4    |
| 26    | 133323    | 1        | -7.6   | 4    |
| 27    | 10042942  | 1        | -7.6   | 0    |
| 28    | 160487    | 1        | -7.5   | 5    |
| 29    | 22179     | 1        | -7.5   | 4    |
| 30    | 31415     | 1        | -7.4   | 4    |
| 31    | 179491    | 1        | -7.4   | 4    |
| 32    | 100067    | 1        | -7.4   | 8    |
| 33    | 12313549  | 1        | -7.4   | 4    |
| 34    | 65631     | 1        | -7.4   | 2    |
| 35    | 101289740 | 1        | -7.3   | 4    |
| 36    | 440595    | 1        | -7.3   | 5    |

|    |           |   |      |    |
|----|-----------|---|------|----|
| 37 | 196885    | 1 | -7.3 | 4  |
| 38 | 101140028 | 1 | -7.3 | 4  |
| 39 | 53266     | 1 | -7.3 | 5  |
| 40 | 16573     | 1 | -7.2 | 4  |
| 41 | 91884708  | 1 | -7.2 | 4  |
| 42 | 282014    | 1 | -7.1 | 5  |
| 43 | 157129    | 1 | -7.1 | 5  |
| 44 | 10153     | 1 | -7.1 | 4  |
| 45 | 10573801  | 1 | -7.1 | 4  |
| 46 | 10405046  | 1 | -7.1 | 3  |
| 47 | 5280794   | 1 | -7.1 | 6  |
| 48 | 5742590   | 1 | -7.1 | 13 |
| 49 | 131751584 | 1 | -7   | 5  |
| 50 | 12313923  | 1 | -7   | 3  |
| 51 | 73117     | 1 | -6.9 | 0  |
| 52 | 5484202   | 1 | -6.9 | 6  |
| 53 | 57525693  | 1 | -6.9 | 7  |
| 54 | 10717392  | 1 | -6.8 | 4  |
| 55 | 14526072  | 1 | -6.8 | 5  |
| 56 | 222284    | 1 | -6.8 | 7  |
| 57 | 165225    | 1 | -6.7 | 9  |
| 58 | 12016618  | 1 | -6.7 | 4  |
| 59 | 15690955  | 1 | -6.6 | 5  |
| 60 | 10143     | 1 | -6.6 | 4  |
| 61 | 442876    | 1 | -6.6 | 8  |
| 62 | 6432404   | 1 | -6.6 | 0  |
| 63 | 145858    | 1 | -6.5 | 1  |
| 64 | 91884834  | 1 | -6.4 | 9  |
| 65 | 90785     | 1 | -6.3 | 2  |
| 66 | 12306048  | 1 | -6.1 | 1  |
| 67 | 441005    | 1 | -6   | 1  |
| 68 | 10398656  | 1 | -6   | 2  |
| 69 | 91457     | 1 | -5.8 | 2  |
| 70 | 10657     | 1 | -5.8 | 1  |
| 71 | 92762     | 1 | -5.6 | 2  |
| 72 | 6432005   | 1 | -5.5 | 2  |
| 73 | 10910653  | 1 | -5.4 | 0  |
| 74 | 76312534  | 1 | -5.4 | 5  |
| 75 | 44566761  | 1 | -5.4 | 3  |
| 76 | 92138     | 1 | -5.4 | 4  |
| 77 | 76312534  | 1 | -5.4 | 5  |
| 78 | 12306052  | 1 | -5.4 | 1  |
| 79 | 1549026   | 1 | -5.3 | 6  |
| 80 | 91354     | 1 | -5.3 | 0  |
| 81 | 22559443  | 1 | -5.3 | 0  |
| 82 | 9548705   | 1 | -5.3 | 1  |

|     |           |   |      |    |
|-----|-----------|---|------|----|
| 83  | 6432312   | 1 | -5.2 | 2  |
| 84  | 1549025   | 1 | -5.1 | 6  |
| 85  | 5281515   | 1 | -5.1 | 0  |
| 86  | 5280435   | 1 | -5.1 | 14 |
| 87  | 643779    | 1 | -5   | 4  |
| 88  | 7439      | 1 | -5   | 0  |
| 89  | 6918391   | 1 | -4.9 | 3  |
| 90  | 3314      | 1 | -4.9 | 4  |
| 91  | 5282743   | 1 | -4.9 | 14 |
| 92  | 11463     | 1 | -4.9 | 0  |
| 93  | 5316956   | 1 | -4.8 | 10 |
| 94  | 11142     | 1 | -4.8 | 0  |
| 95  | 445639    | 1 | -4.8 | 16 |
| 96  | 5281520   | 1 | -4.8 | 0  |
| 97  | 7439      | 1 | -4.8 | 0  |
| 98  | 643820    | 1 | -4.8 | 5  |
| 99  | 17100     | 1 | -4.8 | 2  |
| 100 | 6549      | 1 | -4.7 | 5  |
| 101 | 5312399   | 1 | -4.7 | 12 |
| 102 | 637566    | 1 | -4.7 | 5  |
| 103 | 22311     | 1 | -4.7 | 0  |
| 104 | 11230     | 1 | -4.6 | 2  |
| 105 | 7463      | 1 | -4.6 | 1  |
| 106 | 5280450   | 1 | -4.6 | 15 |
| 107 | 14896     | 1 | -4.6 | 0  |
| 108 | 5281553   | 1 | -4.5 | 3  |
| 109 | 101629835 | 1 | -4.5 | 1  |
| 110 | 8842      | 1 | -4.5 | 6  |
| 111 | 11005     | 1 | -4.5 | 13 |
| 112 | 170833    | 1 | -4.5 | 2  |
| 113 | 638011    | 1 | -4.4 | 4  |
| 114 | 7794      | 1 | -4.4 | 5  |
| 115 | 31253     | 1 | -4.4 | 4  |
| 116 | 2969      | 1 | -4.4 | 9  |
| 117 | 18818     | 1 | -4.4 | 1  |
| 118 | 6654      | 1 | -4.3 | 0  |
| 119 | 5320250   | 1 | -4.3 | 3  |
| 120 | 2758      | 1 | -4.2 | 0  |
| 121 | 985       | 1 | -4.2 | 15 |
| 122 | 3893      | 1 | -4.2 | 11 |
| 123 | 6616      | 1 | -3.9 | 0  |

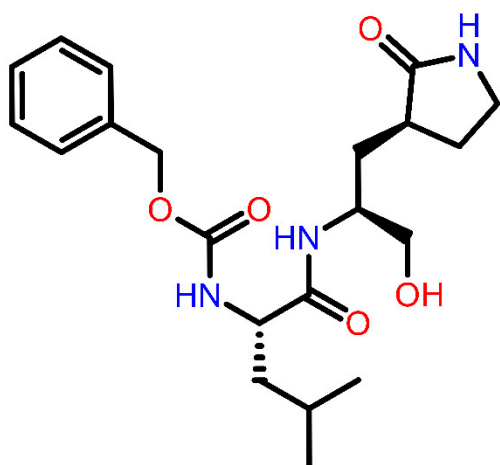

**Figure S1.** 2d image of the reference ligand GC376.

### Redocking and Intermolecular interaction analysis

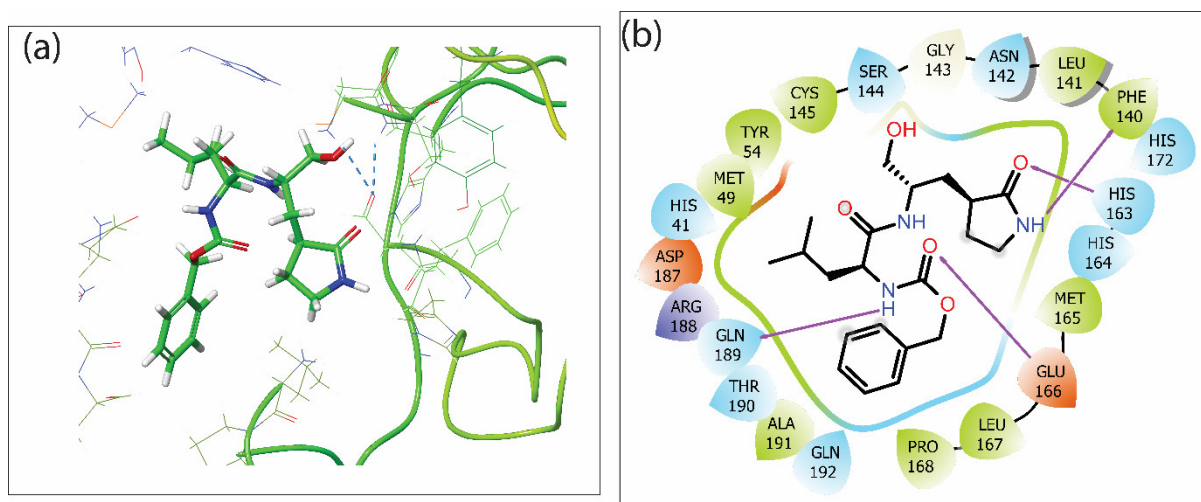

**Figure S2.** (a) 3D and 2D representation of SARS-CoV-2 docked complexes exhibiting intermolecular interactions with reference compound GC376. (b) In 2D interaction profiles, hydrogen bonds (pink arrows), hydrophobic (green), polar (blue), negative (red), positive (violet) and glycine (grey) interactions are shown to be involved between the docked protein-ligand complexes.

**Molecular dynamics simulation analysis.**

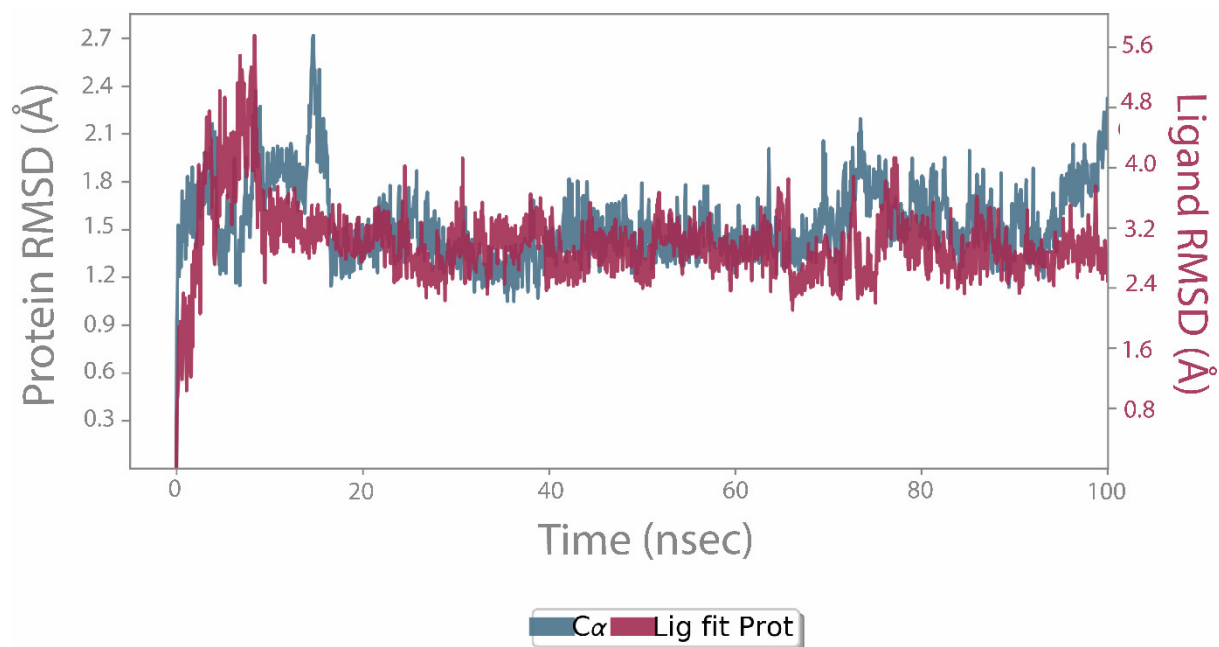

**Figure S3.** RMSD plots for SARS-CoV-2 M<sup>pro</sup> docked with reference compound GC376 extracted from 100 ns MD simulation.

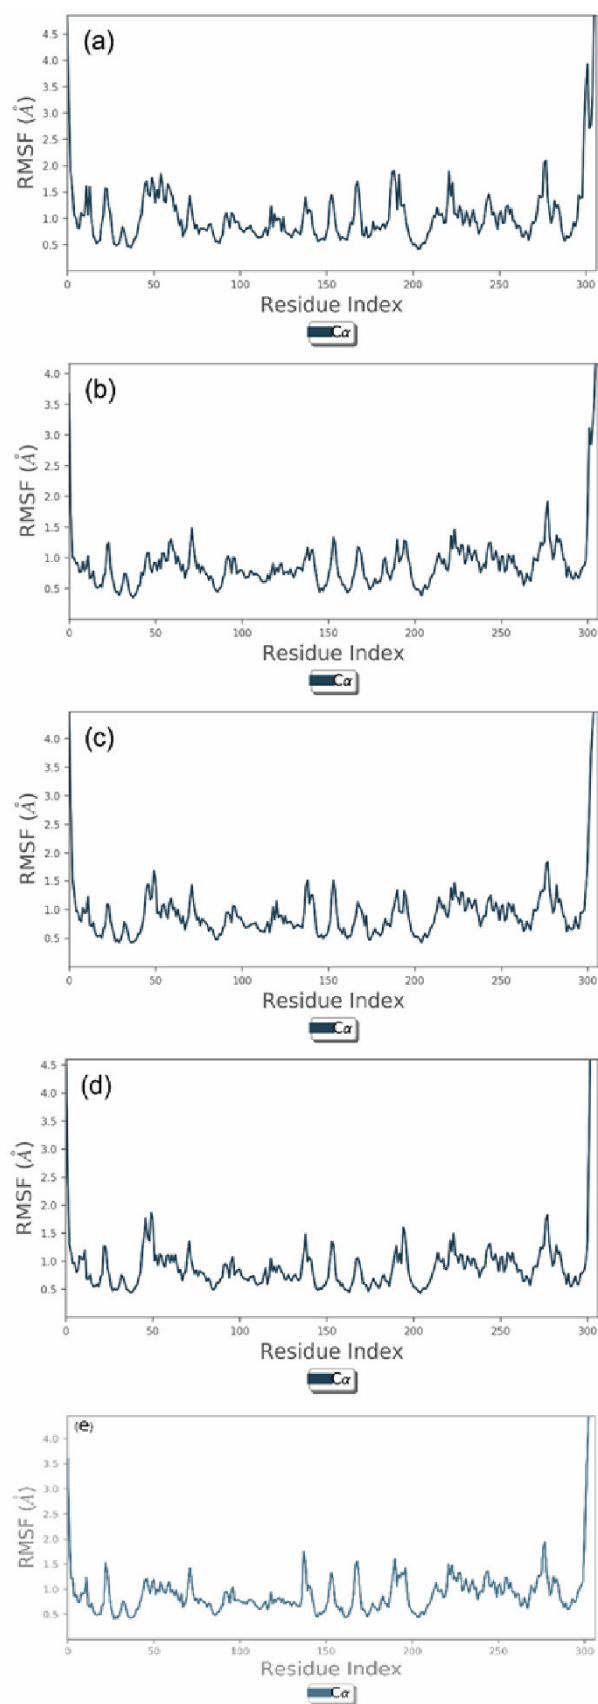

**Figure S4.** RMSF plots for SARS-CoV-2 M<sup>pro</sup> (a) Cassameridine, (b) Laetanine, (c) Litseferine, (d) Cassythicine, and (e) GC376- reference compound for the 100 ns MD simulation time.

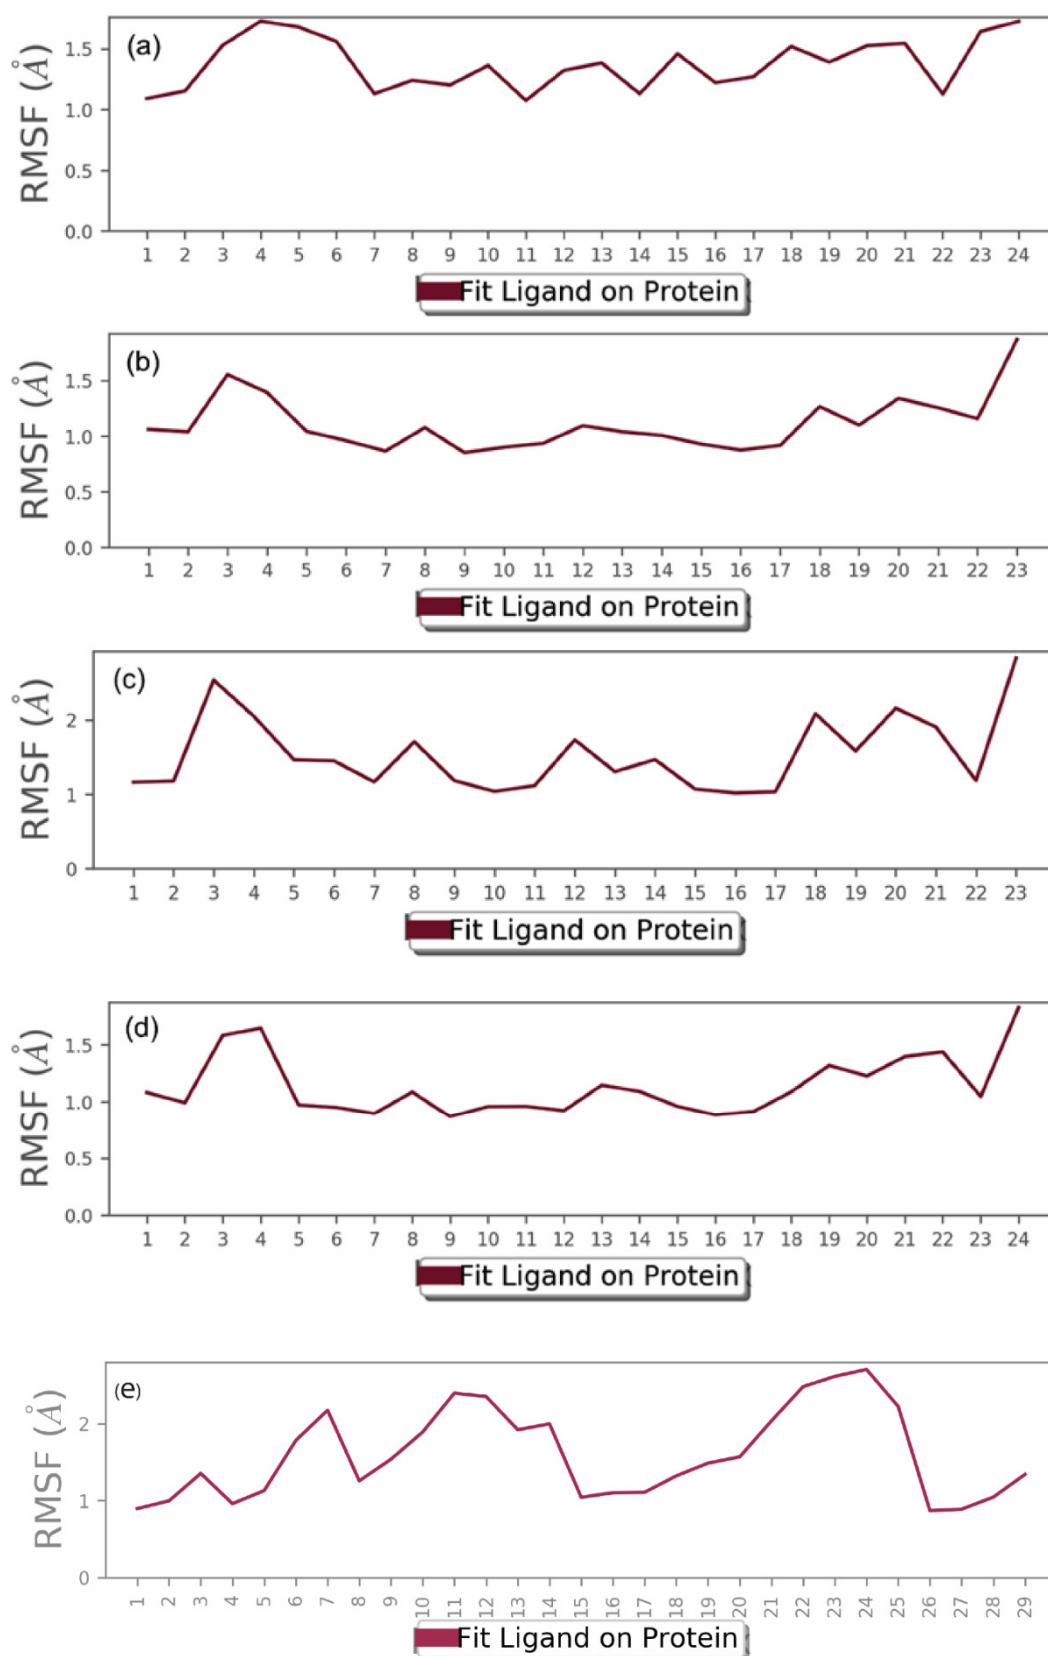

**Figure S5.** RMSF plots for docked complex and reference (a) Cassameridine, (b) Laetanine, (c) Litseferine, (d) Cassythicine, and (e) GC376 for the 100 ns MD simulation time.
